# Supplementary material
Source: publisher figshare collection journal article supplement (https://diabetesjournals.figshare.com/articles/dataset/_/21648233)
Supplement: Supplementary file 2 [file 1]

## Supplemental Data

### ***miR-210-3p* promotes obesity-induced adipose tissue inflammation and insulin resistance by targeting SOCS1 mediated NF- $\kappa$ B pathway**

Debarun Patra<sup>1</sup>, Soumyajit Roy<sup>1</sup>, Leena Arora<sup>1</sup>, Shaheen Wasil Kabeer<sup>2</sup>, Satpal Singh<sup>3</sup>, Upalabdha Dey<sup>4</sup>, Dipanjan Banerjee<sup>4</sup>, Archana Sinha<sup>4</sup>, Suman Dasgupta<sup>4</sup>, Kulbhusan Tikoo<sup>2</sup>, Aditya Kumar<sup>4</sup>, and Durba Pal<sup>1\*</sup>

<sup>1</sup>Department of Biomedical Engineering, Indian Institute of Technology Ropar, Punjab 140001, India

<sup>2</sup>Department of Pharmacology and Toxicology, National Institute of Pharmaceutical Education and Research (NIPER), S.A.S. Nagar, Punjab 160062, India

<sup>3</sup>Department of Gastro Surgery, Dayanand Medical College & Hospital (DMC&H), Ludhiana, Punjab 141001, India

<sup>4</sup>Department of Molecular Biology & Biotechnology, Tezpur University, Assam 784028, India

\*Correspondence should be addressed to: Durba Pal ([durba.pal@iitrpr.ac.in](mailto:durba.pal@iitrpr.ac.in))

Department of Biomedical Engineering,

Indian Institute of Technology Ropar,

Rupnagar-140001, Punjab, India

Ph: (+91) 01881-23-2506

ORCID: 0000-0001-7672-3529

**Figure S1**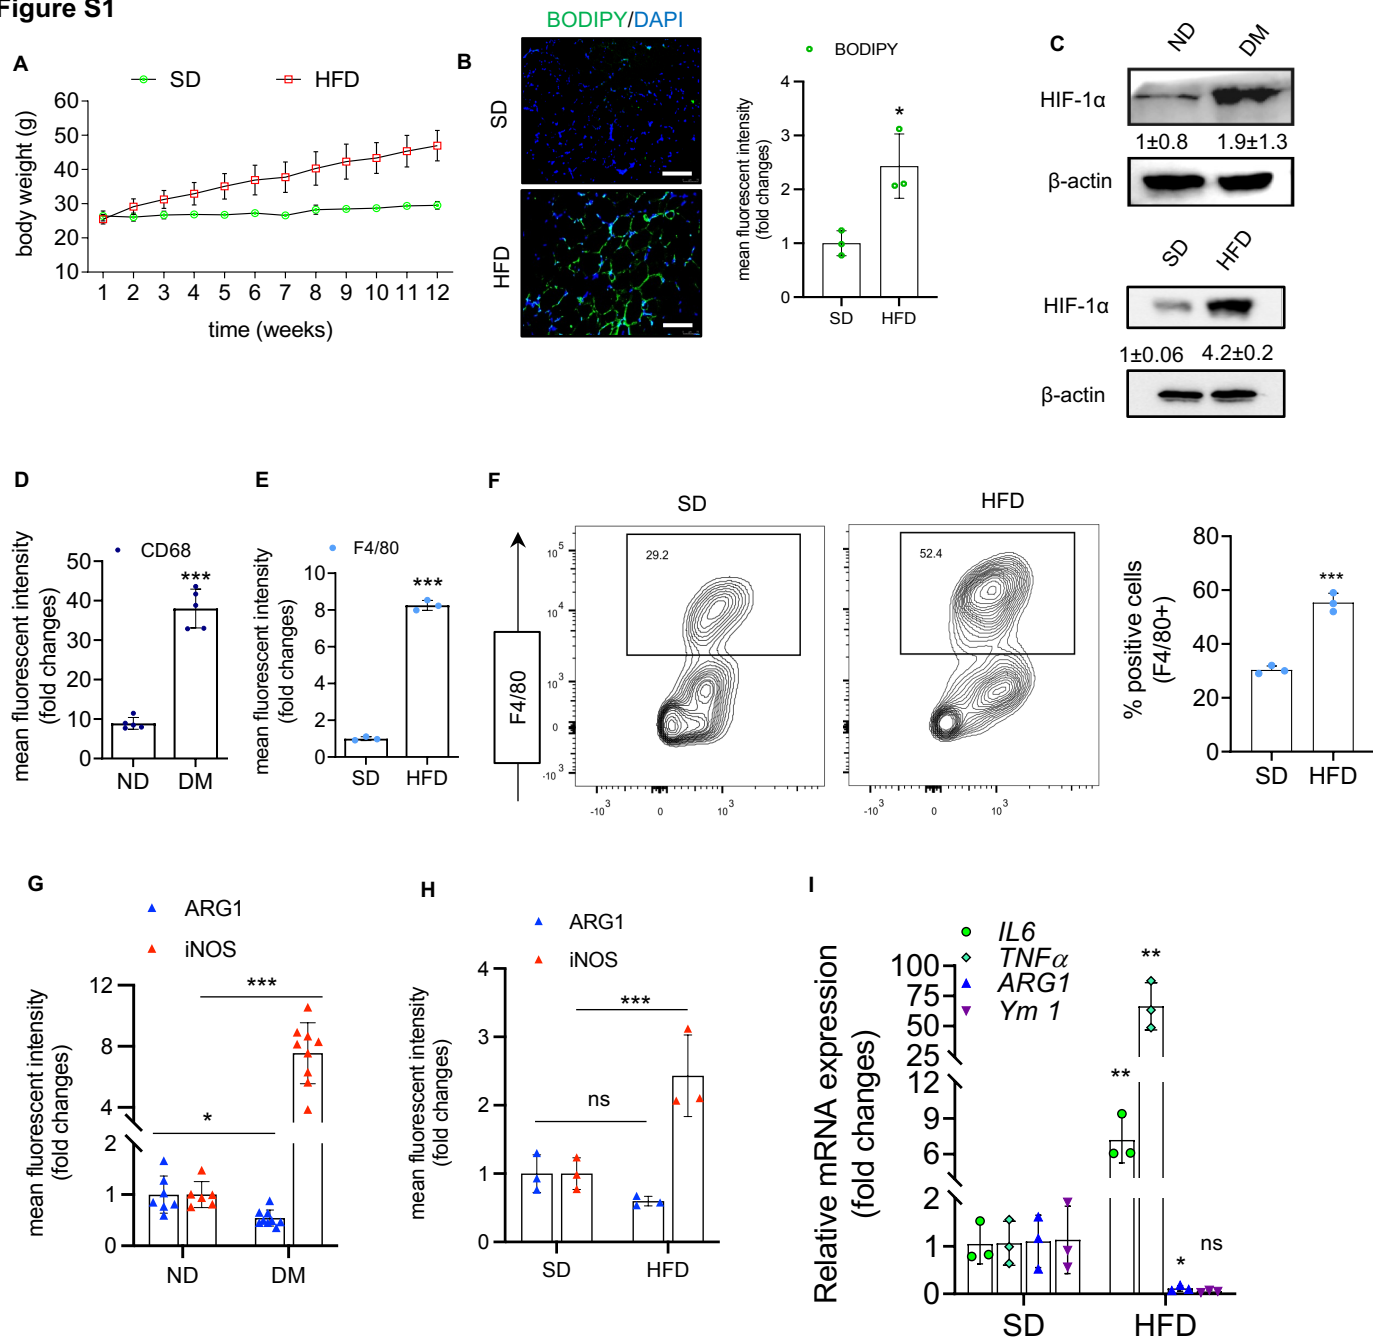**Figure S1**

(A) Body weight of C57BL/6 mice fed with 10%kCal fat diet (SD) or 60%kCal fat diet (HFD) for 12 weeks and body weight was measured. (B) Immunofluorescence images showing BODIPY staining and quantification of mean fluorescence intensity in the adipose tissue section of SD and HFD mice. scale bar, 150μM. (C) HIF-1α protein expression was analyzed in the SVF of control (ND) and obese diabetic (DM) patients VAT and in ATMs of SD and HFD mice VAT. (D) Immunohistochemical quantification analyses of CD68 in control and obese diabetic VAT. (E) Fluorescent intensity quantification analyses of F4/80 expression in SD and HFD VAT. Scale bar, 100μM. (F) Flow cytometry analyses of F4/80+ macrophages in SVF of SD and HFD VAT. (G,H) Immunohistochemical quantification analyses of iNOS and ARG1 in non-diabetic and diabetic VAT (G); in SD and HFD mice VAT (H). (I) qRT-PCR analyses showed the expression of inflammatory cytokines (*IL6*, *TNF-α*, *ARG1*, *Ym1*) in F4/80+ ATMs from SD and HFD mice. Data are expressed as mean ± SD; human sample (n=7-9) and mice sample (n=3); \*p<0.05 \*\*p<0.01 \*\*\*p<0.001 or ns (Student's t-test).

Figure S2

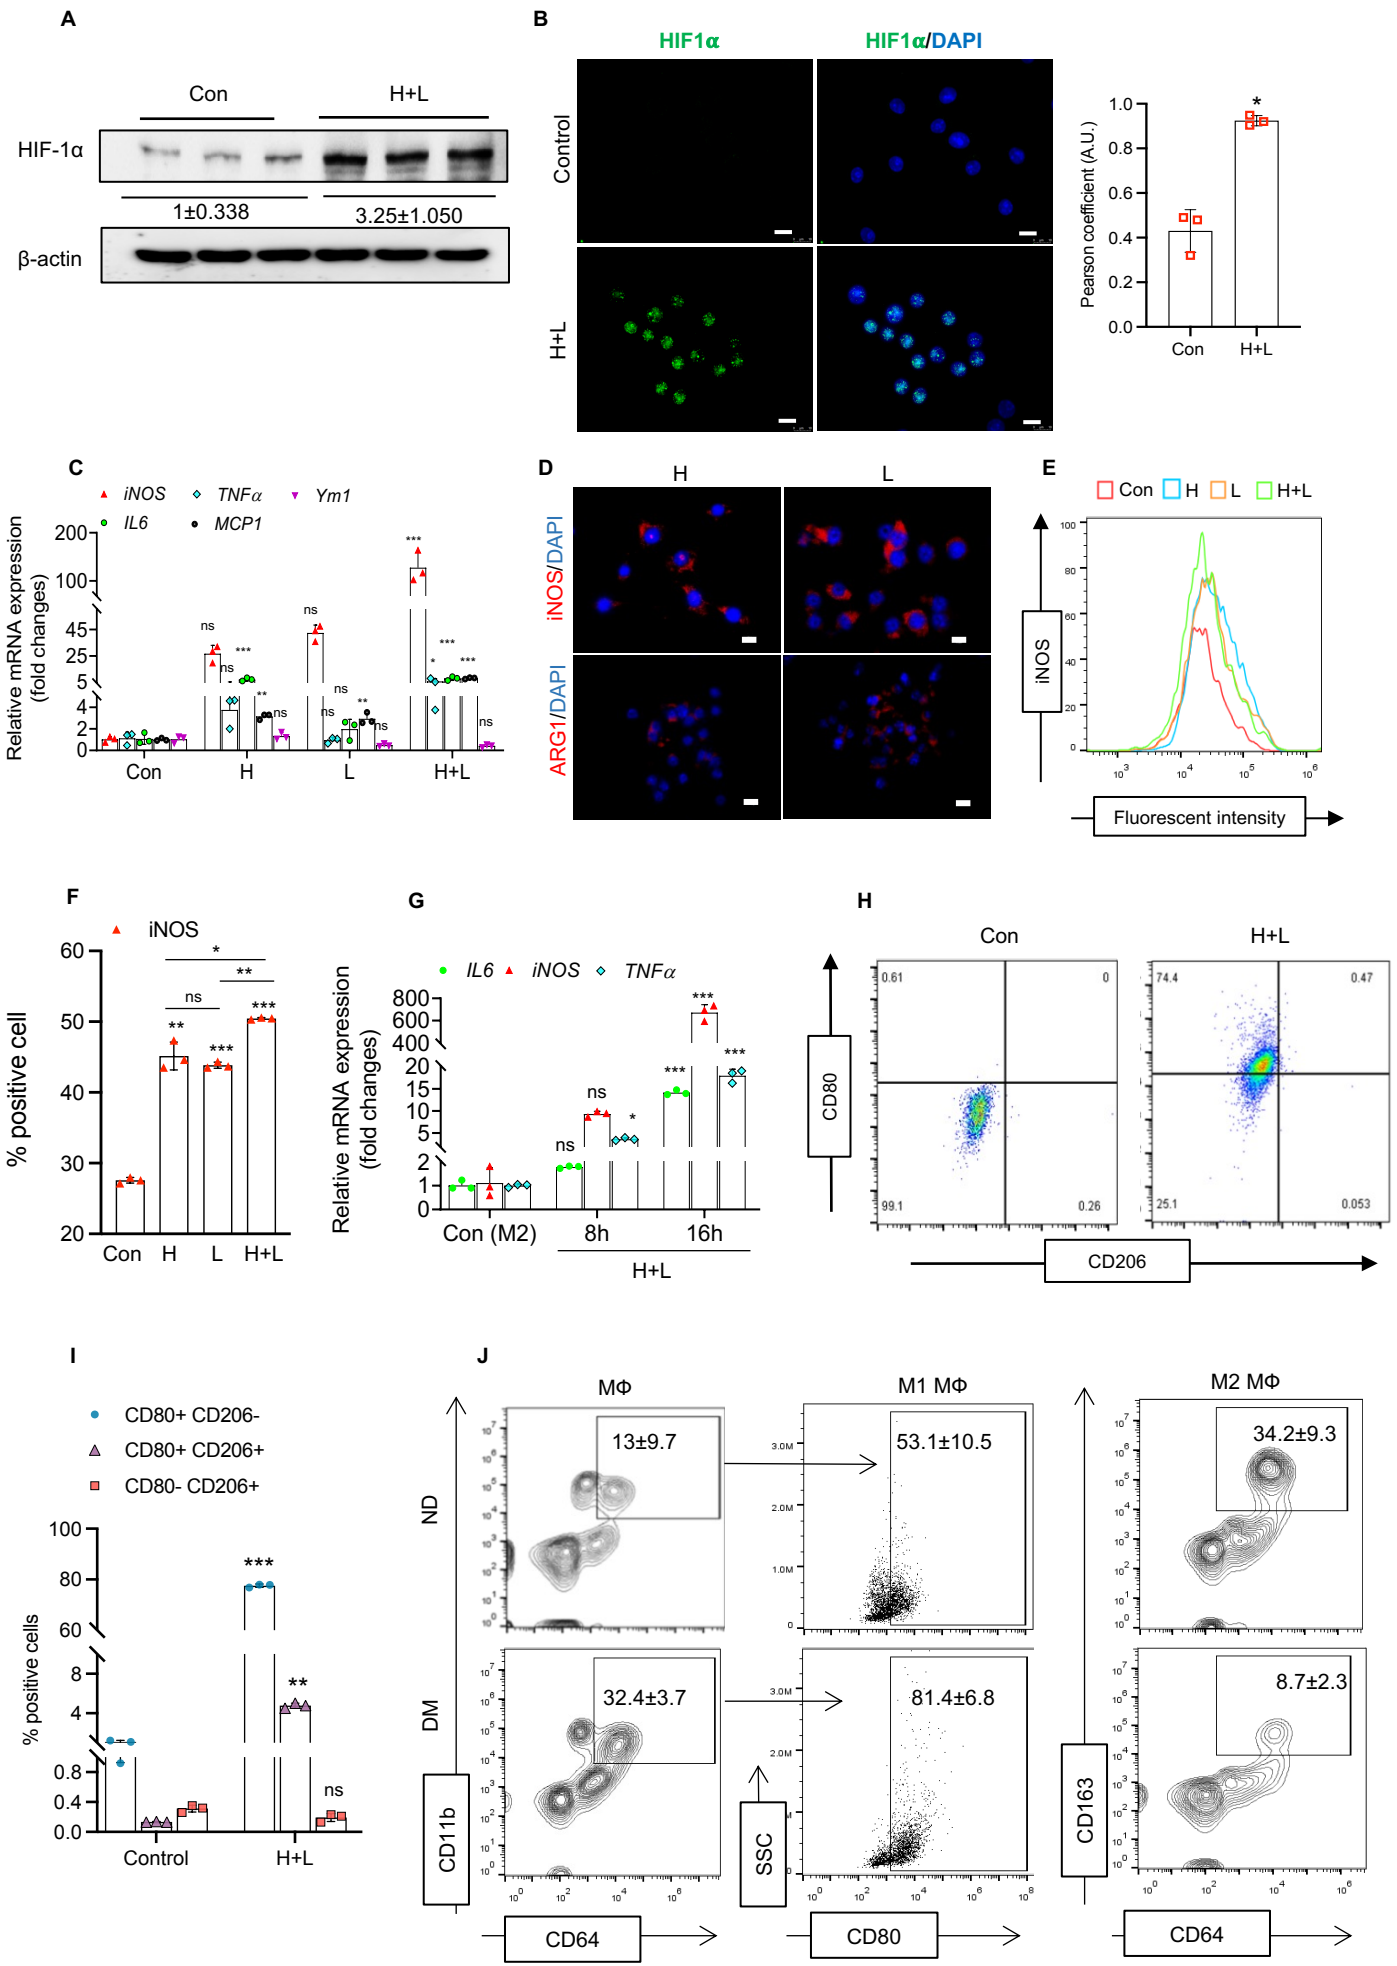

Figure S2

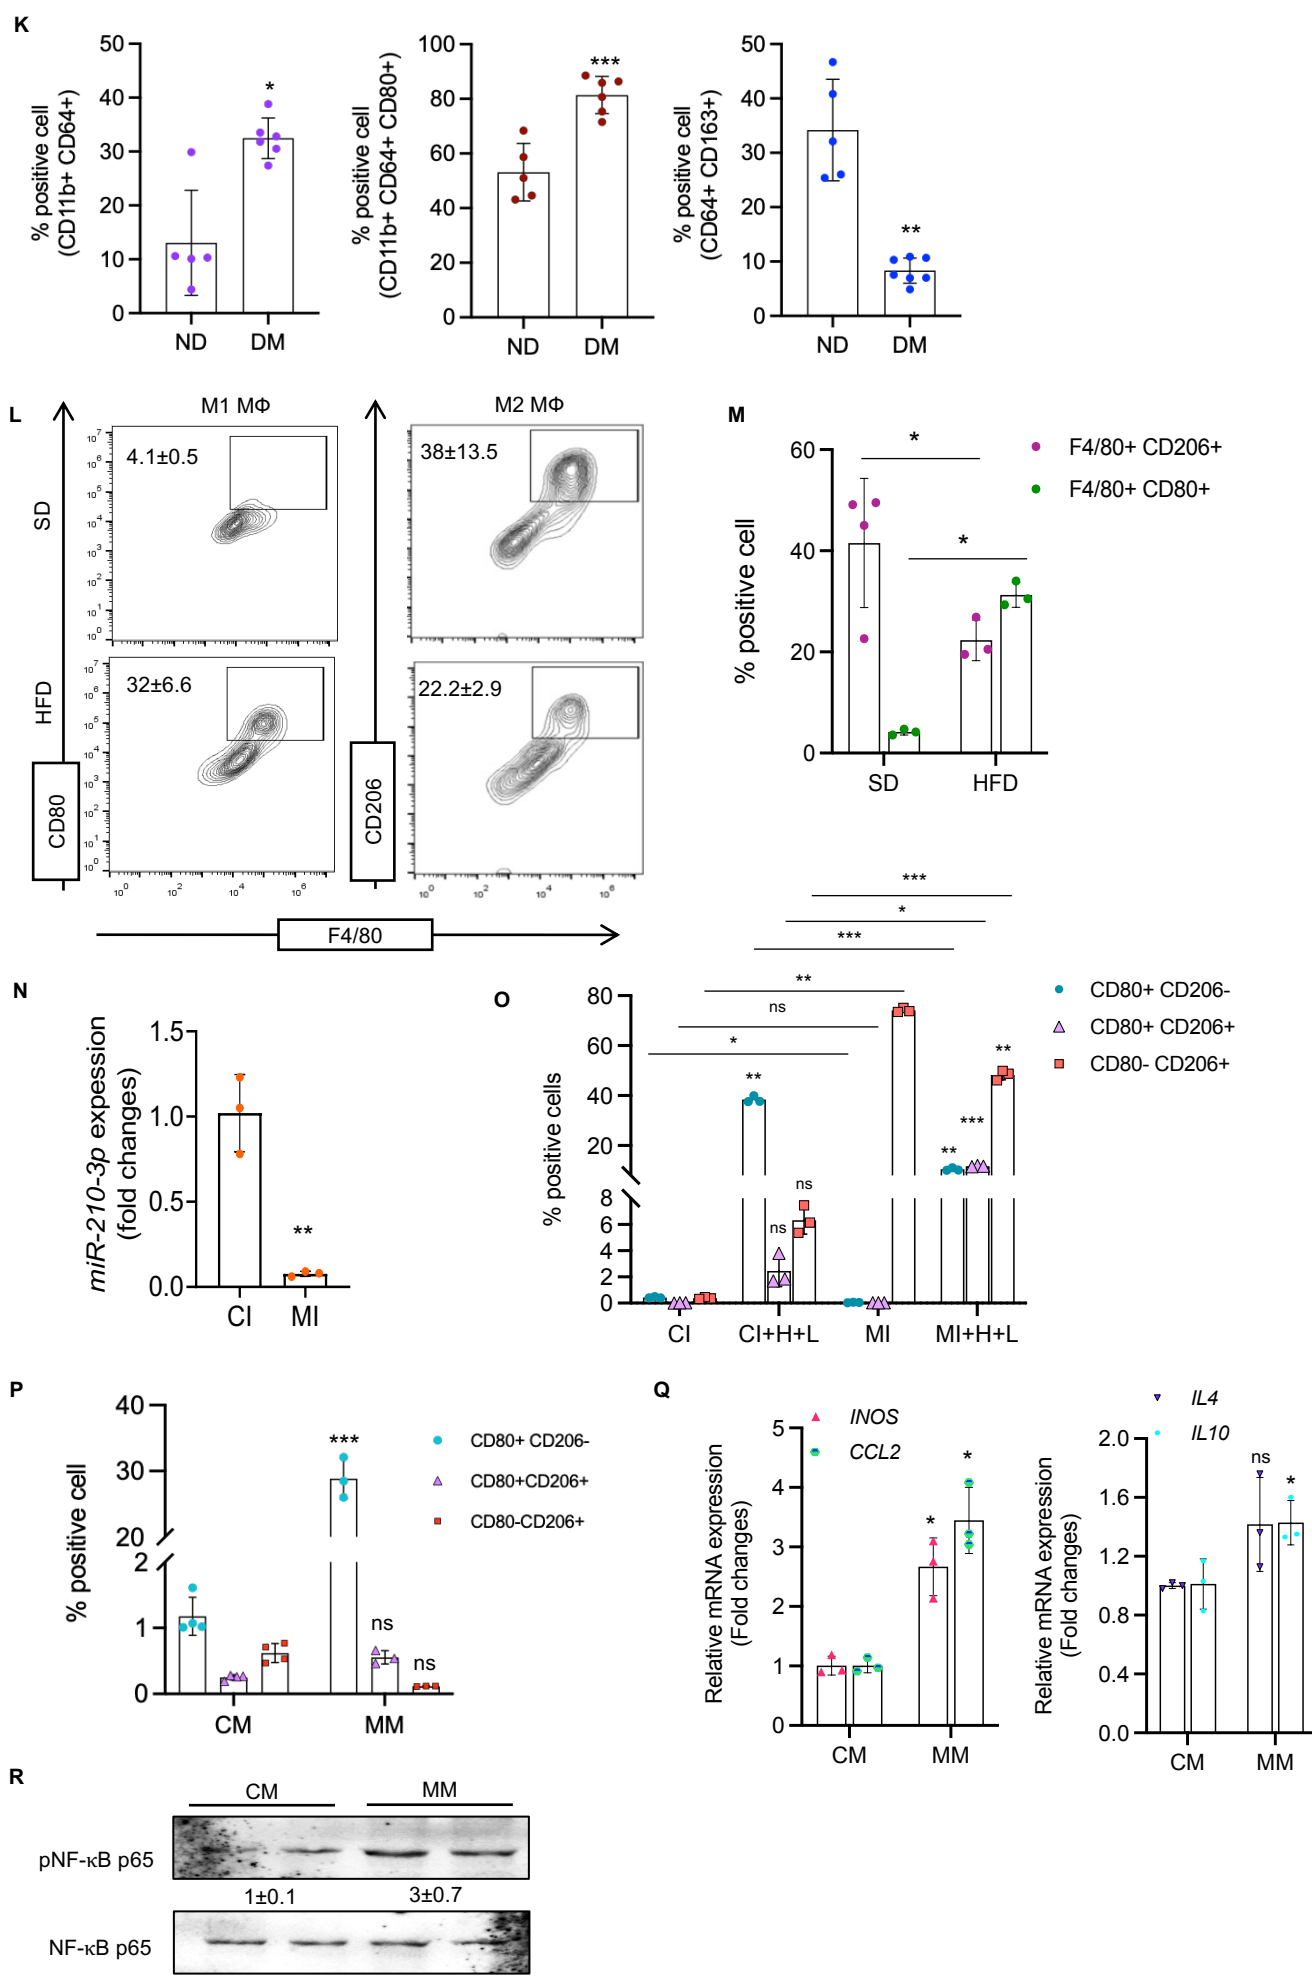

## Figure S2

(A) Immunoblot analyses showed HIF-1 $\alpha$  expression in RAW26.7 macrophage co-treated with or without hypoxia and lipid. (B) Immunofluorescence monograph depicts HIF-1 $\alpha$  (green) expression and nuclear localization in RAW 264.7 macrophages in the presence or absence of hypoxia and lipid. Colocalization quantification was performed using pearson coefficient. scale bar size, 10 $\mu$ M. (C) mRNA expression analysis of pro-inflammatory (*IL6*, *iNOS*, *TNFa*, *MCP1*) and anti-inflammatory cytokine (*Ym1*) in RAW264.7 macrophages under different conditions. (D) Immunofluorescence analyses of *iNOS* and *ARG1* in RAW 264.7 macrophages exposed to hypoxia or lipid individually. scale bar size, 10 $\mu$ M. (E-F) Flow cytometry analysis for *iNOS* in macrophage cells under different conditions and quantification analyses. (G) Quantitative RT-PCR analyses of proinflammatory cytokines (*iNOS*, *TNFa*, *IL6*) in mouse macrophage differentiated into M2 phenotype then co-incubated with hypoxia and lipid for different time periods. (H-I) Flow cytometry analysis of CD80<sup>+</sup> and CD206<sup>+</sup> expression in RAW264.7 macrophages under hypoxia and lipid co-exposure (H); quantification data (I). (J-K) Flow cytometry analysis for CD11b<sup>+</sup>/CD64<sup>+</sup>, CD80<sup>+</sup>, CD64<sup>+</sup>/CD163<sup>+</sup> positive cells from single cell suspension of stromal vascular fraction isolated from visceral adipose tissue of control (ND) and obese diabetic patients (DM) and quantification data (K). (L-M) Flow cytometry analysis for F4/80<sup>+</sup>/CD80<sup>+</sup>, F4/80<sup>+</sup>/CD206<sup>+</sup> positive cells from single cell suspension of stromal vascular fraction isolated from visceral adipose tissue of SD and HFD mice; Quantification data (M). (N) qRT-PCR analyses of *miR-210-3p* expression in murine macrophages transfected with control inhibitor (CI) and *miR-210-3p* inhibitor (MI). (O) FACS quantification of CD80<sup>+</sup>, CD206<sup>+</sup> and CD80<sup>+</sup>CD206<sup>+</sup> cells in control inhibitor (CI) and *miR-210-3p* inhibitor (MI) transfected macrophages co-incubated with or without hypoxia and lipid. (P) FACS quantification of CD80<sup>+</sup>, CD206<sup>+</sup> and CD80<sup>+</sup>CD206<sup>+</sup> cells in control mimic (CM) and *miR-210-3p* mimic (MM) transfected macrophages. (Q) qRT-PCR analyses showed relative mRNA expression of proinflammatory genes *iNOS*, *MCP1* and anti-inflammatory genes *IL4*, *IL10* in adipocytes transfected control mimic (CM) and *miR-210-3p* mimic MM. (R) Western blot analyses showed expression of phosphorylated NF- $\kappa$ B in whole cell lysate from adipocytes transfected with control mimic (CM) and *miR-210-3p* mimic (MM). Data are expressed as means  $\pm$  SD; human sample (n=5-7), mice sample(n=3), cell culture(n=3-4) \*p<0.05, \*\*p<0.01, \*\*\*p<0.001 or ns (Student's t-test or two-way ANOVA).



**Figure S3**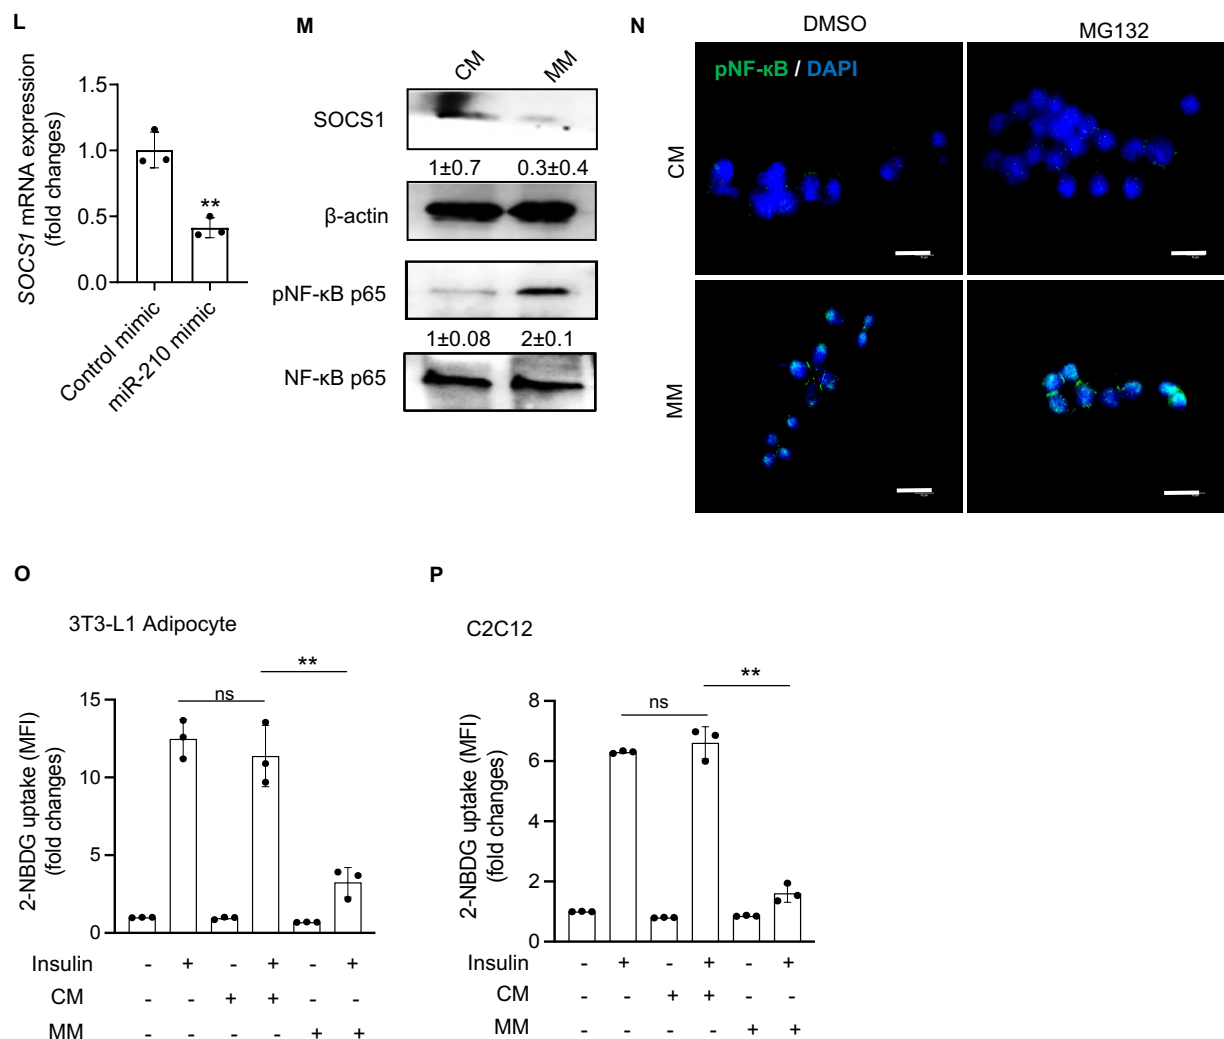**Figure S3**

(A-B) Database (*microRNA.org*) searching result showing the interaction of *miR-210-3p* with human *SOCS1* mRNA (B) and *RNAhybrid* webserver was used to predict the minimum free energy (mfe) of different mouse *SOCS1* mRNA transcripts and *miR-210-3p* interactions (B). (C) Phosphorylated NF-κB expression was quantified by performing western blot analyses in murine macrophages co-exposed to hypoxia and lipid for different time periods. (D) Western blot analyses showed expression of phosphorylated NF-κB p65 in nuclear fraction and cytoplasmic fraction of RAW264.7 macrophages, co-incubated with hypoxia and lipid. LPS exposure counted as positive control for NF-κB activation. (E) Immunofluorescence analyses and mean fluorescence intensity quantification of phospho NF-κB p65 in hypoxia and lipid combined exposed macrophages. DAPI was used for nuclear staining. Scale bar size, 10μM. (F-G) mRNA expression analysis (F) and western blot analyses (G) showed reduced expression of *SOCS1* in *SOCS1* siRNA transfected macrophages. (H) Immunoblot analyses of phosphorylated NF-κB p65 in control siRNA or *SOCS1* siRNA transfected macrophage co-incubated with or without hypoxia and lipid. (I) Rel A (p65 subunit of NF-κB) interacting partner in EMBL INACT server. (J) Overlapping pie diagram showed selected negative regulators of NF-κB p65 and *miR-210-3p* target molecule as per the miRWALK database search. (K) qRT-PCR analyses of *MYOCD*, *CUL2*, *COMMD1*, *NF-κB1B* and *SOCS1* in control mimic and *miR-210-3p* mimic transfected macrophages. (L-M) Control mimic and *miR-210-3p* mimic transfected macrophages are considered for mRNA expression analyses of *SOCS1* (L) and protein expression of *SOCS1*, phospho NF-κB p65 (M). (N) Immunofluorescence analyses of phosphorylated NF-κB p65 in control mimic and *miR-210-3p* mimic transfected murine macrophages treated with or without MG132. DMSO was used as vehicle control. (O-P) Glucose uptake assay was performed in CM and MM transfected adipocytes (O), and C2C12 (P). Data are expressed as mean ± SD; sample (n=3); \*p<0.05 \*\*p<0.01 \*\*\*p<0.001 or ns (Student's t-test).

**Figure S4**

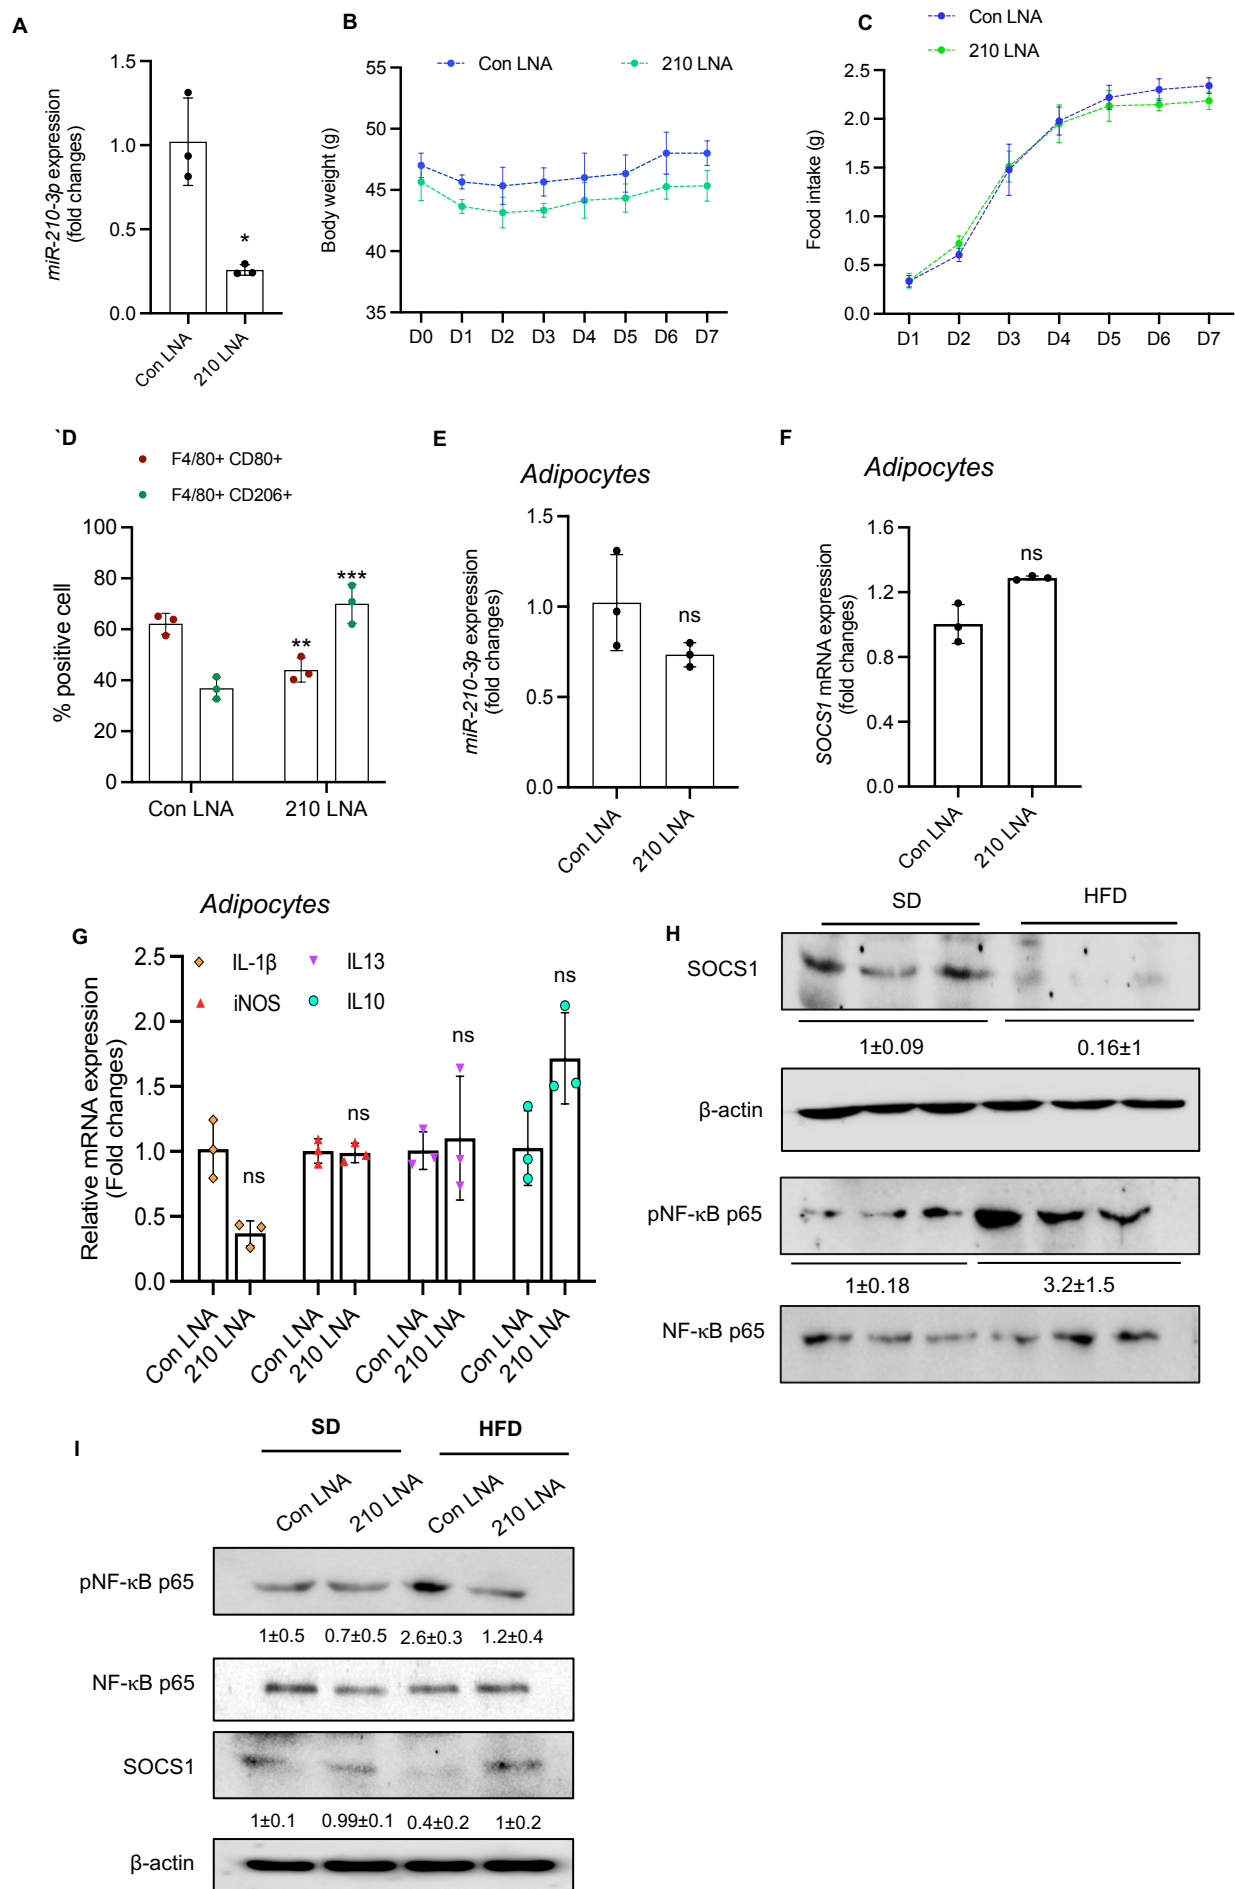

#### Figure S4

(A) qRT-PCR analyses showed *miR-210-3p* expression in ATMs isolated from control inhibitor LNA and *miR-210-3p* inhibitor LNA injected adipose tissue. (B-C) Body weight (B) and daily food intake data (C) in HFD mice undergo surgical procedures to administer control inhibitor LNA and anti-*miR-210-3p* LNA. (D) FACS quantification of F4/80<sup>+</sup>CD206<sup>+</sup> and F4/80<sup>+</sup>CD80<sup>+</sup> adipose tissue macrophage population in SVF isolated from VAT of control LNA and anti-*miR-210-3p* LNA administered HFD mice. (E-G) RT-qPCR analyses showed *miR-210-3p*(E), *SOCS1*(F), inflammatory cytokines *IL-1 $\beta$* , *iNOS*, *IL13*, and *IL10* (G) mRNA expression in adipocytes isolated from control inhibitor LNA and anti-*miR-210-3p* LNA injected adipose tissue of HFD mice. (H) Western blot analyses of *SOCS1* and phospho NF- $\kappa$ B p65 in ATMs isolated from SD and HFD visceral adipose tissue. (I) Immunoblot analyses of phospho NF- $\kappa$ B p65 and *SOCS1* in ATMs isolated from control inhibitor LNA and *miR-210-3p* inhibitor LNA injected adipose tissue of SD and HFD groups. Data are expressed as mean  $\pm$  SD; sample (n=3); \*p<0.05 \*\*p<0.01 \*\*\*p<0.001 or ns (Student's t-test).

**Table S1: Patient demographic details:**

| Pathological features                |                           |
|--------------------------------------|---------------------------|
| Non-obese non-diabetic patients:     |                           |
| Number of patients                   | 7                         |
| Age (median range)                   | 42.4 ± 11.5 (19-56 years) |
| Gender                               | Male (n=2)                |
|                                      | Female (n=5)              |
| BMI (median range)                   | 24.9 ± 1.9 (22.2 - 27.4)  |
| Fasting serum glucose (mmol/L)       | 3.55±0.76                 |
| Any other disease (Cancer and NAFLD) | No                        |
| Obese diabetic patients:             |                           |
| Number of patients                   | 10                        |
| Age (median range)                   | 44.3 ± 11.9 (22-59 years) |
| Gender                               | Male (n=5)                |
|                                      | Female (n=5)              |
| BMI (median range)                   | 35 ± 3.7 (32.2 - 44)      |
| Fasting serum glucose (mmol/L)       | 6.26±0.94                 |
| Any other disease (Cancer and NAFLD) | No                        |

**Table S2: List of antibodies and their details**

| Sl. No. | Antibody                                     | Dilution                                        | Company                   | Catalog No. |
|---------|----------------------------------------------|-------------------------------------------------|---------------------------|-------------|
| 1       | Phospho-NF-κBp65 (S-536)                     | 1:1000 for ICC<br>1:2000 for WB                 | Abcam                     | #ab86299    |
| 2       | SOCS1                                        | 1:100 for IHC<br>1:1000 for WB                  | Invitrogen                | #38-5200    |
| 3       | iNOS                                         | 1:400 for ICC<br>1:400 for IHC<br>1:1500 for FC | Cell Signaling Technology | #13120      |
| 4       | Arginase 1                                   | 1:50 for ICC<br>1:400 for IHC                   | Cell Signaling Technology | #93668      |
| 5       | Anti-Mouse IgG (Alexa Fluor 488 conjugated)  | 1:1000 for ICC<br>1:1000 for IHC                | Cell Signaling Technology | #4408       |
| 6       | Anti-Mouse IgG (Alexa Fluor 594 conjugated)  | 2µg/ml for ICC                                  | Invitrogen                | #A-11032    |
| 7       | Anti-Rabbit IgG (Alexa Fluor 488 conjugated) | 5µg/ml for ICC<br>1:500 for IHC                 | Invitrogen                | #A-11034    |
| 8       | Anti-Rabbit IgG (Alexa Fluor 568 conjugated) | 2µg/ml for ICC<br>2µg/ml for IHC                | Invitrogen                | #A-1101     |
| 9       | HIF1α                                        | 10µg/ml for IHC                                 | Abcam                     | #ab16066    |
| 10      | F4/80                                        | 1:50 for IHC                                    | Santa Cruz Biotechnology  | #sc-377009  |
| 11      | CD68                                         | 1µg/ml for IHC                                  | Abcam                     | #ab125212   |
| 12      | PE anti-mouse CD80                           | 0.5µg/million cells for FC                      | BioLegend                 | #104707     |
| 13      | FITC anti-mouse CD80                         | 1µg/million cells for FC                        | BioLegend                 | #104705     |
| 14      | APC anti-mouse CD206 (MMR)                   | 0.5µg/million cells for FC                      | BioLegend                 | #141707     |
| 15      | PE anti-mouse F4/80                          | 1µg/million cells for FC                        | BioLegend                 | #123110     |
| 16      | PE anti-human CD80                           | 5µl/million cells for FC                        | BioLegend                 | #305207     |
| 17      | APC anti-human CD163                         | 5µl/million cells for FC                        | BioLegend                 | #326510     |
| 18      | FITC anti-human CD64                         | 5µl/million cells for FC                        | BioLegend                 | #305006     |
| 19      | APC anti-mouse/human CD11b                   | 0.25µg/million cells for FC                     | BioLegend                 | #101212     |
| 20      | PE anti-human CD68 Antibody                  | 5µl/million cells for FC                        | BioLegend                 | #333807     |
| 21      | TruStainFcX™ (anti-mouse CD16/32)            | 0.1µg/million cells for FC                      | BioLegend                 | #101319     |
| 22      | NF-κB p65                                    | 2µg/ml for WB                                   | Invitrogen                | #PA1-186    |
| 23      | HRP conjugated Anti-Mouse IgG antibody       | 1:20000 for WB                                  | Sigma-Aldrich             | #A9044      |
| 24      | HRP conjugated Anti-Rabbit IgG antibody      | 1:20000 for WB                                  | Sigma-Aldrich             | #A9169      |
| 25      | β-actin                                      | 1:1000 for WB                                   | Invitrogen                | #AM4302     |

**Table S3: List of primers, antisense oligos (ASOs) and their sequences**

|           | <b>Mouse Primers</b> |                        |                           |
|-----------|----------------------|------------------------|---------------------------|
|           | Gene                 | F (5'-3')              | R (5'-3')                 |
| <b>1</b>  | SOCS1                | CAACGGAACTGCTTCTTCGC   | AGCTCGAAAAGGCAGTCGAA      |
| <b>2</b>  | IL1 $\beta$          | TGCCACCTTTTGACAGTGATG  | GAAGGTCCACGGGAAAGACA      |
| <b>3</b>  | CD163                | TGCTCAGGAAACCAATCCCA   | ACCTCCACTCTTCCAGCG        |
| <b>4</b>  | CD206                | TTCAGCTATTGGACGCGAGG   | GAATCTGACACCCAGCGGAA      |
| <b>5</b>  | CD86                 | CTGTAGGCAGCACGGACTTG   | CATGGTGCATCTGGGGTCCAT     |
| <b>6</b>  | CD200R1              | TCAGTGGCTTCAGAAAATGCAA | GTGCCATTGACTTCGCCTTG      |
| <b>7</b>  | FPR2                 | GAGACCTCAGCTGGTTGTGC   | CATCCGGAATCCAGCTACCC      |
| <b>8</b>  | MMP9                 | CCGACTTTTGTGGTCTTCCC   | TTTGAATCGACCCACGTCT       |
| <b>9</b>  | CCR2                 | AGGAGCCATACCTGTAAATGC  | GGCAGGATCCAAGCTCCAAT      |
| <b>10</b> | Ym1                  | GTTTGGACCTGCCCCGTTT    | CCTTGAATGTCTTTCTCCACAG    |
| <b>11</b> | MHC-IIa              | GAAGACGACATTGAGGCCGA   | GGAACACAGTCGCTTGAGGA      |
| <b>12</b> | IL13                 | GTATGGAGTGTGGACCTGGC   | CTCTGGGTCCTGTAGATGGC      |
| <b>13</b> | IL10                 | CTCGAATGTACCAGGAGCCA   | AGGACGTTTGGCACATCCAT      |
| <b>14</b> | IL4                  | GCATGGCCCAGAAATCAAGG   | GAGAAATCGATGACAGCGCC      |
| <b>15</b> | iNOS                 | CTTGGTGAAGGGACTGAGCTG  | CGTTCTCCGTTCTCTTGCAGT     |
| <b>16</b> | CCL2                 | GATGCAGTTAACGCCCCACT   | AGCTTCTTTGGGACACCTGC      |
| <b>17</b> | Arg1                 | ACATTGGCTTGCGAGACGTA   | ATCACCTTGCCAATCCCCAG      |
| <b>18</b> | TNF $\alpha$         | CGCTGAGGTCAATCTGCCCAAG | GGTCAGAGTAAAGGGGTCAGAGTGG |
| <b>19</b> | $\beta$ -Actin       | GTA CTCTGTGTGGATCGGTGG | AGGGTGTA AACGCAGCTCAG     |
| <b>20</b> | IL6                  | GGGACTGATGCTGGTGACAA   | ACAGGTCTGTTGGGAGTGGT      |
| <b>21</b> | CCL5                 | CTGCCTCCCCATATTCCTCG   | TCGGGTGACAAAGACGACTG      |
| <b>22</b> | CXCL5                | TAAAAGGGGTGCAGTGGGTT   | GAGCACCAGCTCGGGATATG      |
| <b>23</b> | CD64                 | TCTGCTACTTTGGGTTCCAGTC | ATGTGTAGCGGTGTCTTCCC      |
| <b>24</b> | MYOCD                | ATGACATCAGCCAGGAACGC   | GGACCTTTCAGTGGCGGTATT     |
| <b>25</b> | CUL2                 | CCTGGACTGGACCATTGCATC  | AAGTTTAGTGTTGAAACCTGCTCC  |
| <b>26</b> | NF-kBIB              | GACCTCAATAAACCGGAGCCT  | ACCAAGCCTGAGAGAAGCCT      |
| <b>27</b> | COMMD1               | CTGCACAGCCAACTCTATCC   | ACACAAAAATTGAGATTCTGTCCA  |
| <b>28</b> | GLUT1                | GCTGTGCTTATGGGCTTCTC   | CACAAGTCTGCATTGCCCAT      |

(F: Forward primer; R: Reverse primer)

| Human Primers |         |                      |                      |
|---------------|---------|----------------------|----------------------|
|               | Gene    | F (5'-3')            | R (5'-3')            |
| 1             | SOCS1   | CACTTCCGCACATTCCGTTC | AGGCCATCTTCACGCTAAGG |
| 2             | β-actin | GAGCACAGAGCCTCGCCTTT | ACATGCCGGAGCCGTTGTC  |

| SOCS1 3' UTR primer details |               |                                |                             |
|-----------------------------|---------------|--------------------------------|-----------------------------|
|                             | Gene          | F (5'-3')                      | R (5'-3')                   |
| 1                           | SOCS1 (mut-1) | TAATGCTGCGTGCGGGCGCTGCCG       | CGGCAGCGCCCGCACGCAGCATTA    |
| 2                           | SOCS1 (mut-2) | GCCCGCCGTGCACGATTA ACTGGGAT GC | CATCCCAGTTAATCGTGACAGGCGGGC |

| microRNA Primers |            |                                                                                                                       |          |               |
|------------------|------------|-----------------------------------------------------------------------------------------------------------------------|----------|---------------|
|                  |            | Sequences                                                                                                             | Assay ID | Accession No. |
| 1                | U6 snRNA   | GTGCTCGCTTCGGCAGCACATATACTAA<br>ATTGGAACGATACAGAGAAGATTAGCAT<br>GGCCCCTGCGCAAGGATGACACGCAAAT<br>TCGTGAAGCGTTCCATATTTT | 001973   | NR_004394     |
| 2                | miR-210-3p | CUGUGCGUGUGACAGCGGCUGA                                                                                                | 000512   | MI0000286     |

(F: Forward primer; R: Reverse primer)
